# Supplementary material
Source: MDPI journal article supplement (https://www.mdpi.com/2311-5637/7/4/286)
Supplement: s1 [file s1]

# Effects of paper mulberry silage on the growth performance, rumen microbiota and muscle fatty acid composition in Hu Lambs

Yi Xiong<sup>1</sup>, Chunze Guo<sup>1</sup>, Lin Wang<sup>2</sup>, Fei Chen<sup>1</sup>, Xianwen Dong<sup>2</sup>, Xiaomei Li<sup>1</sup>, Kuikui Ni<sup>1</sup> and Fuyu Yang<sup>1,\*</sup>

<sup>1</sup> College of Grassland Science and Technology, China Agricultural University, Beijing, 100193, China; xiongleslie@126.com(Y.X.); 1194371896@qq.com(C.G.); 836081022@qq.com(F.C.); b20193040360@cau.edu.cn(X.L.); nikk@cau.edu.cn(K.N.)

<sup>2</sup> ChongQing Academy of Animal Sciences, Chongqing, 402460, China; 451502537@qq.com(L.W.); dxwcqxky@163.com(X.D.)

\* Correspondence: yfuyu@126.com; Tel.: +86-010-62733052

**Supplementary Materials:** The following are available online at [www.mdpi.com/xxx/s1](http://www.mdpi.com/xxx/s1).

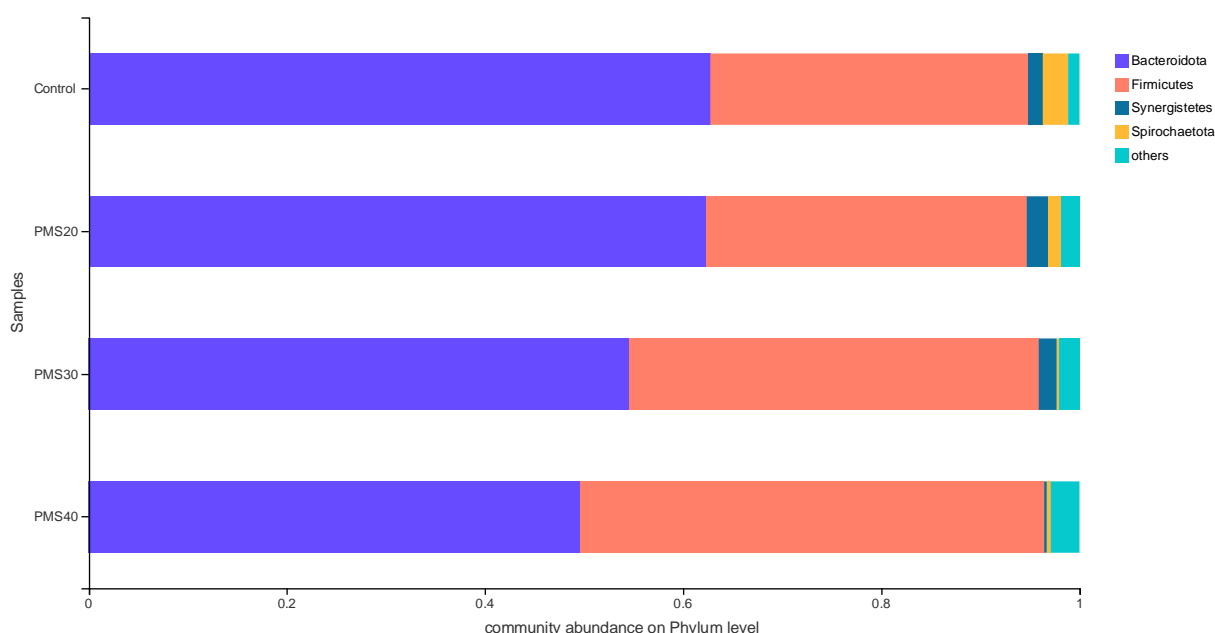

**Figure S1.** The relative abundance of microbial community at the phylum level. Control: dietary without paper mulberry silage, PMS20: dietary with 20% paper mulberry silage, PMS30: dietary with 30% paper mulberry silage, PMS40: dietary with 40% paper mulberry silage.

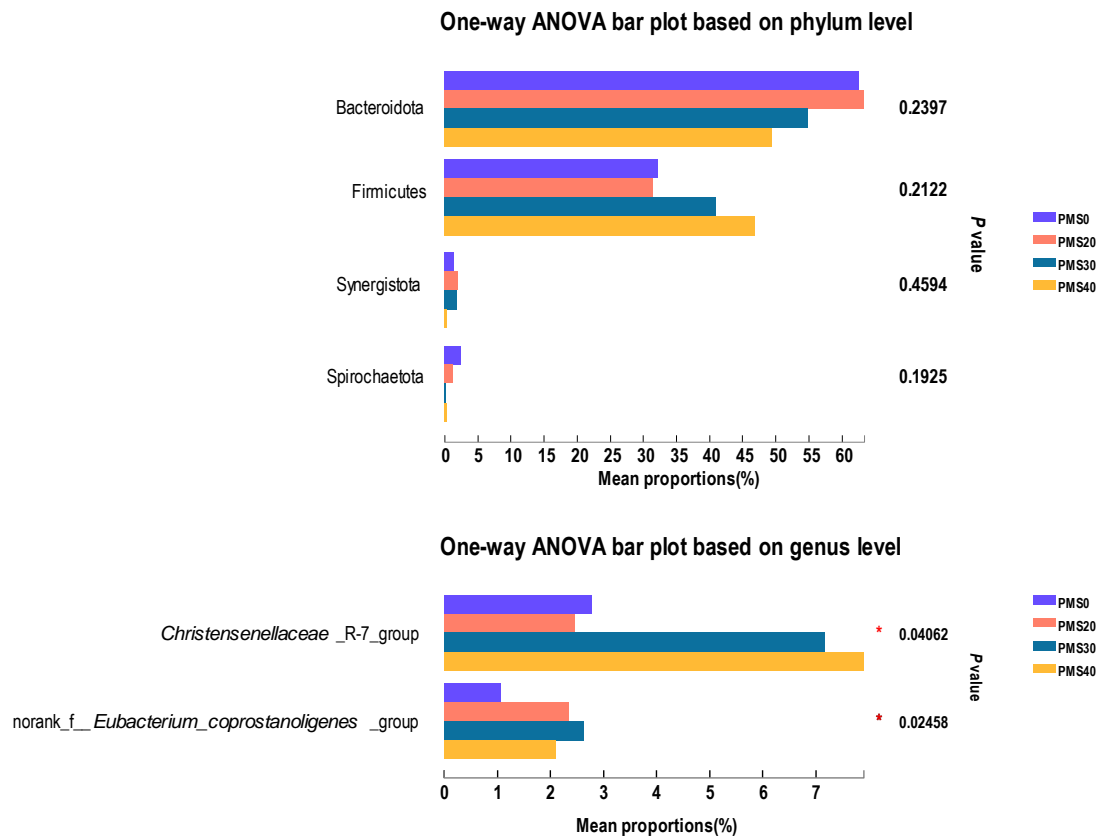

**Figure S2.** One-way ANOVA of microbial community of PMS treatments. Control: dietary without paper mulberry silage, PMS20: dietary with 20% paper mulberry silage, PMS30: dietary with 30% paper mulberry silage, PMS40: dietary with 40% paper mulberry silage.
